# Supplementary material for: A 5-(difluorenyl)-1,10-phenanthroline-based Ru(ii) complex as a coating agent for potential multifunctional gold nanoparticles
Source: Royal Society of Chemistry journal article supplement (doi:10.1039/c4cp01534g), 2014-01-01
Supplement: c4cp01534g1.pdf [file c4cp01534g1.pdf]

## Electronic Supplementary Informations

# A 5-(difluorenyl)-1,10-phenanthroline-based Ru(II) complex as coating agent for potential multi-functional gold nanoparticles.

J. Moreau, F. Lux, M. Four, Joanna Olesiak-Banska, Katarzyna Matczyszyn, P. Perriat, Céline Frochot, Philippe Arnoux, O. Tillement, G. Ponterini, Marek Samoc, S. Roux, G. Lemerrier

### Table of Contents

|                                                                                             |                                                                                                                                                                                                           |      |
|---------------------------------------------------------------------------------------------|-----------------------------------------------------------------------------------------------------------------------------------------------------------------------------------------------------------|------|
| - <b>Figure S1:</b>                                                                         | Preliminary modelling of the particle size (diam 8-9 nm).                                                                                                                                                 | p. 2 |
| - <b>Fluorimetric analysis of Au Nps/ Ru complex binding equilibrium</b>                    |                                                                                                                                                                                                           | p. 3 |
| - <b>Figure S2:</b>                                                                         | Emission intensities of (PFF)LT-diS:Ru emission at 610 nm<br>as a function of its absorbance at 420 nm.                                                                                                   | p. 4 |
| - <b>Figure S3 and text Study of the mechanism and efficiency in luminescence quenching</b> |                                                                                                                                                                                                           | p. 5 |
| - <b>Figure S4</b>                                                                          | $^1\text{O}_2$ emission spectra in the toluene                                                                                                                                                            | p. 6 |
| - <b>Number of Ru(II) complexes per Np calculation</b>                                      |                                                                                                                                                                                                           | p. 6 |
| - <b>Figure S5.</b>                                                                         | Determination of the molar absorption coefficients of<br>the free Ru(II) complex $[\text{Ru}(\text{PFF})_2\text{LT-diS}](\text{PF}_6)_2$ and the related<br>Ru-functionalized nanoparticles AuNP-[Ru-PFF] | p. 7 |
| - <b>Table S1.</b>                                                                          | Two-photon absorption cross-sections for the free Ru(II) complex<br>$[\text{Ru}(\text{PFF})_2\text{LT-diS}](\text{PF}_6)_2$ and the related Ru-functionalized<br>nanoparticles AuNP-[Ru-PFF].             | p. 8 |

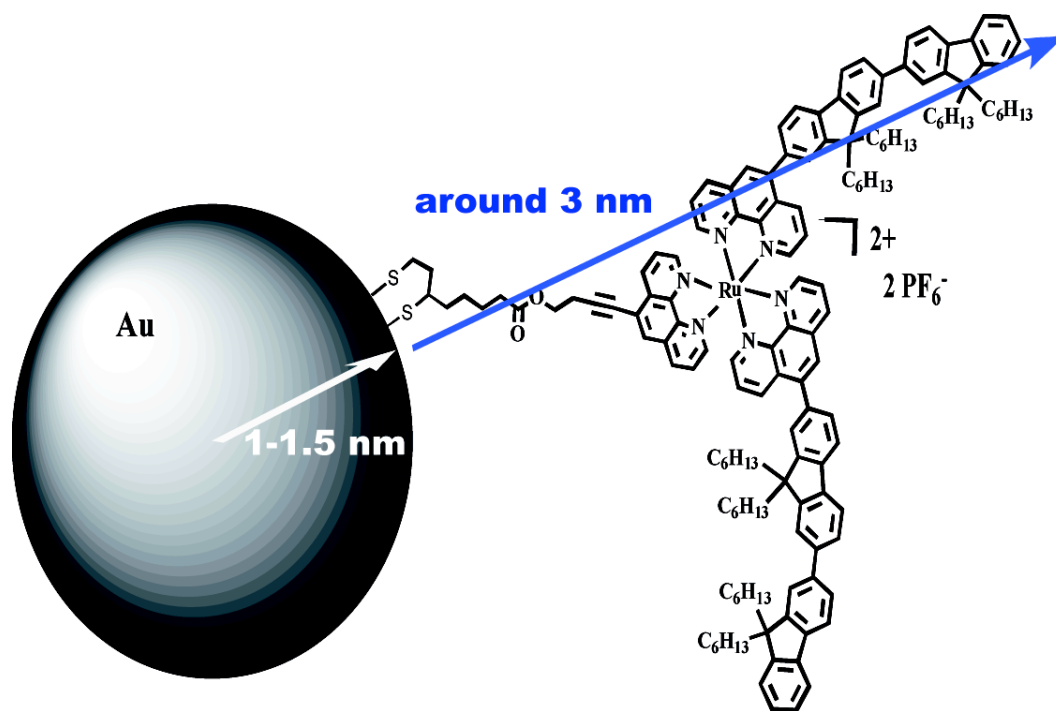

**Figure S1.** Preliminary modelling of the particle size (diam 8-9 nm).

## Fluorimetric analysis of Au Nps/ Ru complex binding equilibrium

We assume that each Ru compound can bind to each site in the Au nanoparticle with the same affinity and independently of the occupation of nearby sites, and represent the corresponding dissociation equilibrium as  $SC = S + C$ . We indicate the concentrations of free binding sites as S, of the free Ru compounds as C, and of the Au-bound Ru compounds as SC, and write

the dissociation equilibrium constant as  $K_D = \frac{S \cdot C}{CS} = \frac{\alpha^2 C_T}{(1-\alpha)}$ , where  $\alpha$  is the dissociation

degree of the SC complexes and  $C_T$  is the total concentration of Ru compounds. This is assumed the same as that of binding sites, i.e., in the solid complex the latter are assumed saturated with Ru complexes.

For a solution of Ru compounds at a concentration  $C_T$  the observed emission intensity is  $I_F = F \cdot 10^{-0.5\epsilon_{\text{exc}} C_T d} \cdot \Phi_F$ , with F being an instrumental factor,  $\epsilon_{\text{exc}}$  the molar extinction coefficient at the excitation wavelength, d the optical path and  $\Phi_F$  the emission quantum yield of the unbound Ru compound. For a solution of Ru-coated Au Nps having the same concentration of Ru compounds,  $C_T$ , the emission intensity is the sum of the contributions from free and bound fluorophores:  $I = F \left[ \alpha 10^{-0.5\epsilon_{\text{exc}} C_T d} \cdot \Phi_F + (1-\alpha) 10^{-0.5\epsilon_{\text{exc}} C_T d} \Phi_B \right]$ , where  $\Phi_B$

is the quantum yield of the Au-bound fluorophores. At  $C_T$  values large enough as to have a negligible dissociation degree, the emission intensity ratio

$R = \frac{I}{I_F} = \left[ \alpha \cdot \Phi_F + (1-\alpha)\Phi_B \right] / \Phi_F$  takes the value  $R^\infty = \Phi_B / \Phi_F$ . So,

$R = \alpha + (1-\alpha)R^\infty = R^\infty + \alpha(1-R^\infty) \cong R^\infty + \alpha$  because  $R^\infty \ll 1$  (see Figure GP2). So,

$\alpha = R - R^\infty = \Delta R$ ,  $K_D = \frac{\Delta R^2 C_T}{(1-\Delta R)}$  and a  $\frac{\Delta R^2}{(1-\Delta R)} / C_T^{-1}$  regression provides  $K_D$ .

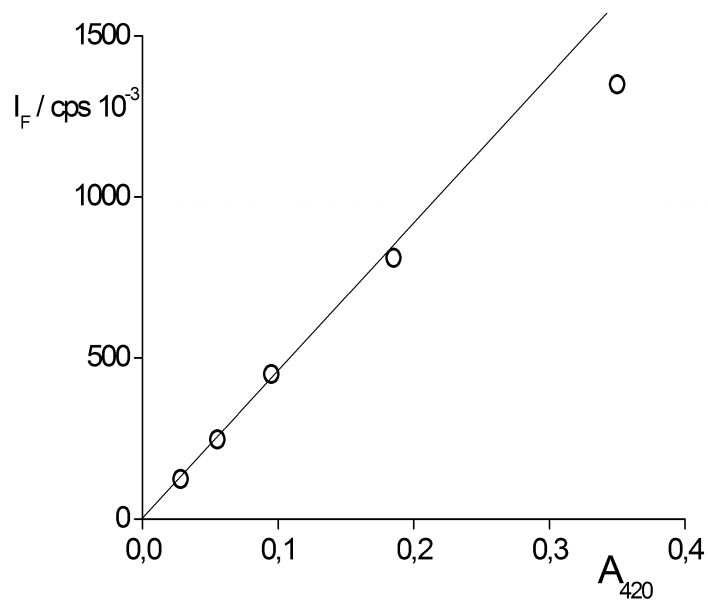

**Figure S2.** Intensity of **(PFF)LT-diS:Ru** emission at 610 nm as a function of its absorbance at 420 nm.

## Study of the mechanism and efficiency in luminescence quenching.

In fluid solution, the dependence of emission intensity and lifetime with quencher concentration is given by the following Stern-Volmer equations :

$$\frac{\tau_0}{\tau} = \frac{I_0}{I} = 1 + K_{SV}[O_2] = 1 + k_q \tau_0 [O_2] = 1 + k_q \tau_0 K_H^{solv} P_{O_2}$$

where the  $I$  parameters are emission intensities, the  $\tau$  are lifetimes,  $K_{SV}$  is the Stern-Volmer quenching constant,  $k_q$  is the bimolecular rate constant for quenching of the excited state, and  $K_H^{solv}$ , the Henry constant of  $O_2$  (gaz) in the particular solvent. The subscript  $0$  denotes the values of the quantity in the absence of the quencher. Plots of  $I_0/I$  versus oxygen concentration will be linear with identical slopes equal to  $K_{SV}$  if there is a single class of luminophores that are all equally accessible to the quencher. That is what was observed in our case (see Figure S1 below) for  $I_0/I$  representations, for the ruthenium complex  $[\text{Ru}(\text{PFF})_2\text{LT-diS}](\text{PF}_6)_2$  and the related Ru-functionalized nanoparticles  $\text{AuNP-}[\text{Ru-PFF}]$ .

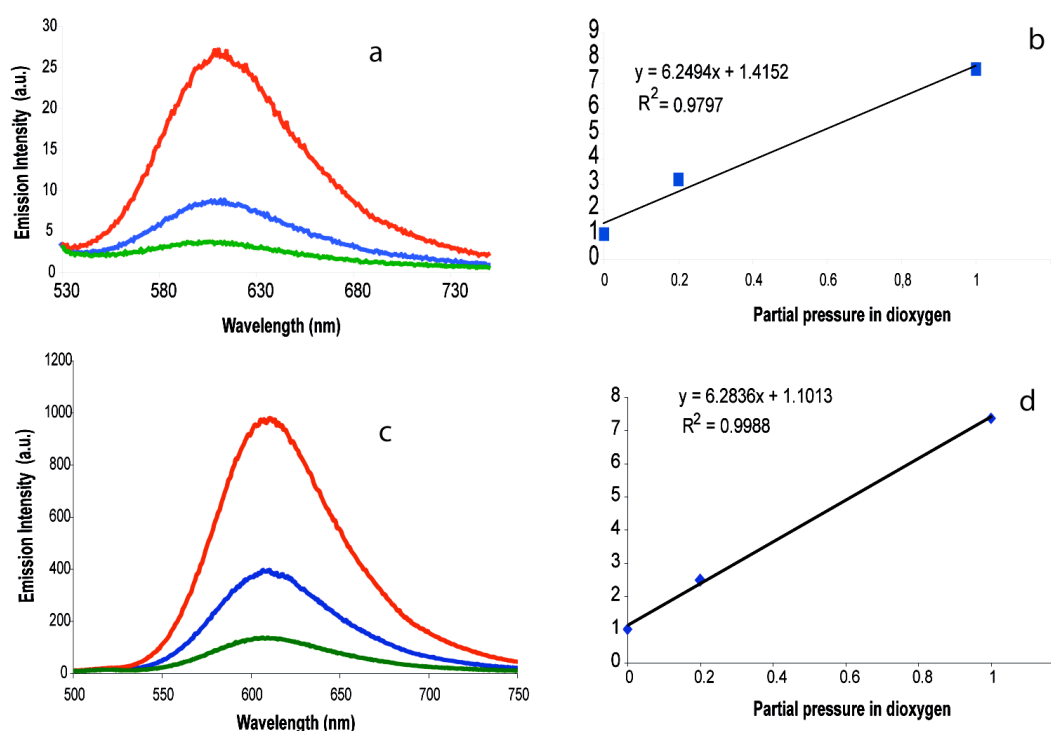

**Figure S3.** Related emission spectra (left, a, and c) and dependence of the  $I_0/I$  (right, b and d) with the oxygen partial pressure for  $[\text{Ru}(\text{PFF})_2\text{LT-diS}](\text{PF}_6)_2$  complex (bottom) and the related gold Nps ( $\text{AuNP-}[\text{Ru-PFF}]$ , top).

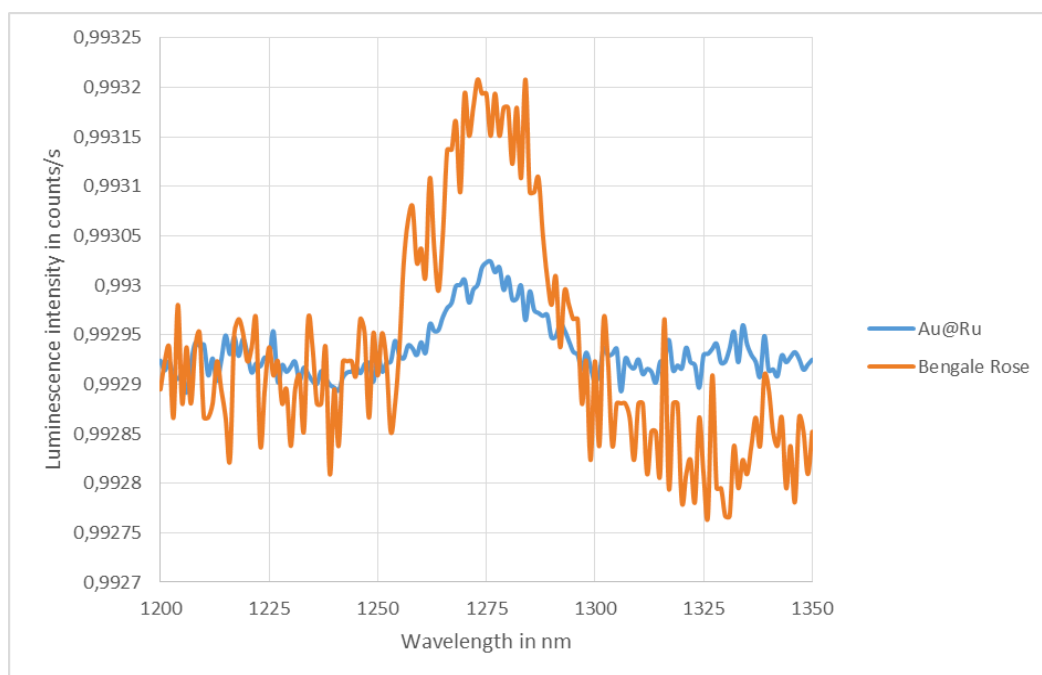

**Figure S4.** : Related  $^1\text{O}_2$  emission spectra in the toluene, after excitation at 420 nm of the Ru-functionalized nanoparticles **AuNP-[Ru-PFF]** and Rose Bengale (Absorbance around 0.2)

### Number of Ru(II) complexes *per* Np calculation

Elemental analysis is in good agreement with a *ratio* Ru/Au equal to 0.5. Starting with 2 nm diameter Nps, and a density of  $19.3 \text{ g/cm}^3$  for gold, each nanoparticle may contain around 240 atoms (Np vol =  $4.2 \cdot 10^{-21} \text{ cm}^3$  ; Np weight =  $8 \cdot 10^{-20} \text{ g}$  and Au  $M_w = 197 \text{ g/mol}$ ). Then, each nanoparticle is decorated with around 100 Ru(II) complexes.

Taking into account the size of NP ( $d = 2 \text{ nm}$ ), and assuming the density of the material equal to bulk gold ( $19\,300 \text{ kg/m}^3$ ) we determined the mass of one nanoparticle. Then, basing on the radius of NP determined with dynamic light scattering technique (8.5 nm), we calculated the average number of Ru molecules attached to one NP to be  $\sim 100$ . Thus, the molar weight of functionalized nanoparticles is  $320500 \text{ g/mol}$ ; the molar absorption coefficient was then determined (see Figure S3).

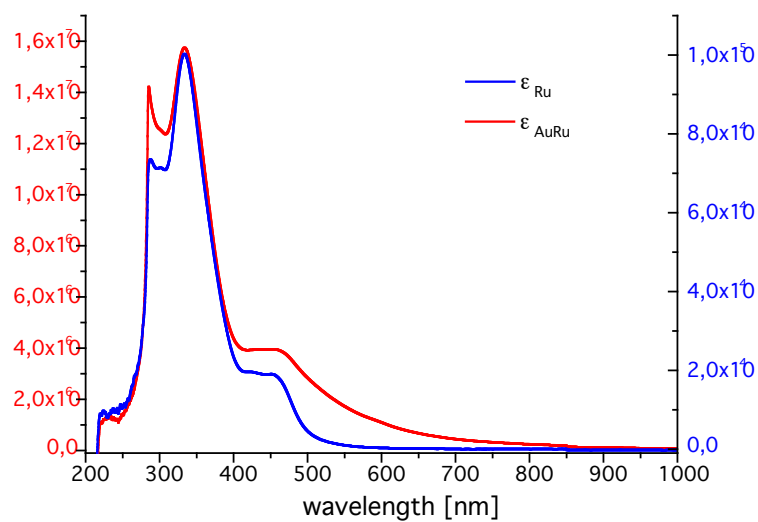

**Figure S5.** : Determination of the molar absorption coefficients of the free Ru(II) complex  $[\text{Ru}(\text{PFF})_2\text{LT-diS}](\text{PF}_6)_2$  and the related Ru-functionalized nanoparticles  $\text{AuNP-}[\text{Ru-PFF}]$ .

**Table S1** : Two-photon absorption cross-sections for the free Ru(II) complex **[Ru(PFF)<sub>2</sub>LT-diS](PF<sub>6</sub>)<sub>2</sub>** and the related Ru-functionalized nanoparticles **AuNP-[Ru-PFF]**.

| Wavelength<br>[nm] | $\sigma_2$ Ru<br>[GM] | error $\sigma_2$<br>[GM] | Wavelength<br>[nm] | $\sigma_2$<br>AuRu[GM] | error $\sigma_2$<br>[GM] | $\sigma_2/100$<br>AuRu<br>[GM] | error $\sigma_2$<br>[GM] |
|--------------------|-----------------------|--------------------------|--------------------|------------------------|--------------------------|--------------------------------|--------------------------|
| 600                | 7065                  | 250                      | 550                | -4.98E+05              | 95000                    | -                              | 1000                     |
| 630                | 4411                  | 450                      | 560                | -1.24E+06              | 152000                   | -                              | 1500                     |
| 650                | 5547                  | 400                      | 625                | 1.07E+05               | 8400                     | 1.07E+03                       | 100                      |
| 675                | 2916                  | 450                      | 676                | 3.23E+05               | 21000                    | 3.23E+03                       | 200                      |
| 700                | 2868                  | 500                      | 775                | 1.79E+04               | 2000                     | 1.79E+02                       | 20                       |
| 775                | 804                   | 150                      | 800                | 9.13E+04               | 7000                     | 9.13E+02                       | 70                       |
| 925                | 1094                  | 500                      | 825                | 2.32E+04               | 2000                     | 2.32E+02                       | 20                       |
| 940                | 680                   | 150                      | 910                | 5.20E+04               | 2000                     | 5.20E+02                       | 20                       |
| 970                | 994                   | 200                      | 930                | 9.71E+04               | 4300                     | 9.71E+02                       | 40                       |
